# Supplementary material
Source: publisher figshare collection journal article supplement (https://acs.figshare.com/ndownloader/files/5762694)
Supplement: Supplementary file 1 [file 5762694]

## Synthesis and Reactivity of Alkoxy, Aryloxy, and Dialkylamino Phosphazene Azides

Michael B. McIntosh, Thomas J. Hartle, and Harry R. Allcock\*

Department of Chemistry  
The Pennsylvania State University  
152 Davey Laboratory  
University Park, PA 16802

### Supporting Information

**Instruments.**  $^{31}\text{P}$  (144.8 MHz), and  $^1\text{H}$  (360 MHz) NMR spectra were recorded with a Bruker AMX360 NMR spectrometer, which employed a broad band CPMAS pencil probe. Chemical shifts are relative to external 85% aqueous  $\text{H}_3\text{PO}_4$  ( $^{31}\text{P}$  NMR) or tetramethylsilane ( $^1\text{H}$  NMR). The  $^{31}\text{P}$  NMR spectra were proton-decoupled. Fast atom bombardment mass spectrometry was conducted on a Kratos MS-50 mass spectrometer with a magnetic sector using xenon atoms and a nitrophenyl octyl ether matrix.

### Experimental

**Synthesis of  $\text{N}_3\text{P}_3(\text{OC}_6\text{H}_5)_5\text{Cl}$ ,  $\text{N}_3\text{P}_3(\text{OC}_6\text{H}_5)_4\text{Cl}_2$ , and  $\text{N}_3\text{P}_3(\text{OC}_6\text{H}_5)_3\text{Cl}_3$ .** These materials were synthesized by a previously reported procedure.<sup>1</sup> The cis form of  $\text{N}_3\text{P}_3(\text{OC}_6\text{H}_5)_3\text{Cl}_3$  was isolated by crystallization from hexanes at  $-11^\circ\text{C}$  followed by several recrystallizations from hexanes.

**Synthesis of  $\text{N}_3\text{P}_3(\text{OC}_6\text{H}_5)_5\text{N}_3$ .**  $\text{N}_3\text{P}_3(\text{OC}_6\text{H}_5)_5\text{Cl}$  (4.0 g,  $6.3 \times 10^{-3}$  mol) was dissolved in 2-butanone (60 mL) at room temperature. Tetrabutylammonium bromide,  $n\text{-Bu}_4\text{NBr}$ , (0.28 g,  $8.7 \times 10^{-4}$  mol) was added to the solution followed by solid sodium azide,  $\text{NaN}_3$  (0.60 g,  $9.2 \times 10^{-3}$  mol). The reaction was then heated to reflux for 24h, allowed to cool to room temperature, and examined by  $^{31}\text{P}$  NMR to check for complete conversion to the azide. The solvent was then removed by rotovap, and the resultant oily, white solid was extracted between diethyl ether (100 mL) and deionized water (100 mL).

The ether layer was washed again with deionized water (100 mL) and then with 4% aqueous  $\text{NaHCO}_3$  (100 mL). The ether layer was then dried with  $\text{MgSO}_4$  and filtered to yield a clear, pale yellow solution. The ether was removed by rotovap to yield a slightly cloudy oil. The oil was further purified by column chromatography on silica gel with 60% hexanes/40%  $\text{CH}_2\text{Cl}_2$  as the solvent. The purified fractions were combined, and the solvent was removed by rotovap to yield a colorless oil. The oil was dissolved in hot hexanes (50 mL), filtered, and allowed to cool to room temperature. A clear colorless, oil separated from solution on cooling the mixture to  $-11\text{ }^\circ\text{C}$ . The hexanes were decanted off, and the oil was dried under vacuum. After several days, the oil crystallized to form a white solid. Yield: 3.6 g (89%).  $^{31}\text{P}$  NMR ( $\text{CDCl}_3$ )  $\delta = 13.6$  (t, 1P), 8.6 (d, 2P);  $^1\text{H}$  NMR ( $\text{CDCl}_3$ )  $\delta = 7.3\text{--}6.9$  (m, 25H);  $\text{C}_{30}\text{H}_{25}\text{N}_6\text{O}_5\text{P}_3$  calculated mass 642.77; FAB(+)-MS: 643.2 [ $\text{MH}^+$ ].

**Synthesis of  $\text{N}_3\text{P}_3(\text{OC}_6\text{H}_5)_4(\text{N}_3)_2$ .**  $\text{N}_3\text{P}_3(\text{OC}_6\text{H}_5)_4\text{Cl}_2$  (6.0 g; 0.010 mol) was dissolved in 2-butanone (60 mL). Sodium azide (2.0 g; 0.031 mol) and  $n\text{-Bu}_4\text{NBr}$  (0.20 g;  $6 \times 10^{-4}$  mol) were added, and the mixture was heated to reflux for 24h. The solvent was removed by rotovap, and the product was extracted between  $\text{Et}_2\text{O}$  (100 mL) and 5% aqueous  $\text{K}_2\text{CO}_3$  (100 mL). The ether layer was washed with additional 5% aqueous  $\text{K}_2\text{CO}_3$  (100 mL). The ether layer was dried with  $\text{MgSO}_4$ , filtered, and the ether removed by rotovap to yield an oil. The oil was purified by column chromatography on silica (60% ethyl acetate/ 40% hexanes). The solvent was removed by rotovap. The product oil was then dissolved in hexanes and cooled to  $-55\text{ }^\circ\text{C}$  to crystallize the product. The hexanes were decanted off, and the product was allowed to warm to room temperature where it melted to form a clear, colorless oil. The oil was redissolved in hexanes and cooled to  $-55\text{ }^\circ\text{C}$  again. The hexanes were decanted off and the product allowed to warm to room temperature. The resultant oil was then dried under vacuum. Yield: 4.9 g (80%).  $^{31}\text{P}$  NMR ( $\text{CD}_2\text{Cl}_2$ )  $\delta = 13.2\text{--}12.3$  (overlapping d, cis + trans isomers, 2P), 8.5-7.2 (overlapping q, cis + trans isomers, 1P);  $^1\text{H}$  NMR ( $\text{CD}_2\text{Cl}_2$ )  $\delta = 7.6\text{--}6.9$  (m, 20H);  $\text{C}_{24}\text{H}_{20}\text{N}_9\text{O}_4\text{P}_3$  calculated mass 591.40; FAB(+)-MS: 592.1 [ $\text{MH}^+$ ].

**Synthesis of  $\text{N}_3\text{P}_3(\text{OC}_6\text{H}_5)_3(\text{N}_3)_3$ .**  $\text{N}_3\text{P}_3(\text{OC}_6\text{H}_5)_3\text{Cl}_3$  (5.0 g,  $9.6 \times 10^{-3}$  mol) was dissolved in distilled toluene (100 mL) under  $\text{N}_2$ .  $n\text{-Bu}_4\text{NBr}$  (0.26 g,  $8.1 \times 10^{-4}$  mol) was added along with  $\text{NaN}_3$  (3.0 g, 0.046 mol). The reaction mixture was then heated at reflux for

72h. After the reaction was allowed to cool to room temperature, the solvent was removed by rotovap to yield a milky, white oil. The product was then extracted between Et<sub>2</sub>O (125 mL) and 3% aqueous NaHCO<sub>3</sub> (100 mL). The ether layer was washed with additional 3% aqueous NaHCO<sub>3</sub> (100 mL) followed by distilled water (100 mL). The ether layer was then dried with MgSO<sub>4</sub> and filtered. The ether was removed by rotovap to yield a yellow oil. The product was then purified by column chromatography on silica (10% Et<sub>2</sub>O/ 90% hexanes. The purified fractions were combined and rotovapped to yield a clear, colorless oil. The oil was then dried under vacuum for 48h. Yield: 4.2 g (81%). <sup>31</sup>P NMR (CD<sub>2</sub>Cl<sub>2</sub>) δ = 13.1-11.3 (m, overlapping singlet, doublet, and triplet for cis and trans isomers); <sup>1</sup>H NMR (CD<sub>2</sub>Cl<sub>2</sub>) δ = 7.4-6.7 (m, 15H); C<sub>18</sub>H<sub>15</sub>N<sub>12</sub>O<sub>3</sub>P<sub>3</sub> calculated mass: 540.33; FAB(+)-MS: 541.0 [MH<sup>+</sup>].

**Synthesis of N<sub>3</sub>P<sub>3</sub>(N(CH<sub>3</sub>)<sub>2</sub>)<sub>4</sub>Cl<sub>2</sub>.** This compound was synthesized via the literature procedure.<sup>2</sup>

**Synthesis of N<sub>3</sub>P<sub>3</sub>(N(CH<sub>3</sub>)<sub>2</sub>)<sub>4</sub>(N<sub>3</sub>)<sub>2</sub>.** N<sub>3</sub>P<sub>3</sub>(N(CH<sub>3</sub>)<sub>2</sub>)<sub>4</sub>Cl<sub>2</sub> (2.0 g, 5.2 x 10<sup>-3</sup> mol) was dissolved in 2-butanone (50 mL) at room temperature. n-Bu<sub>4</sub>NBr, (0.3 g, 9.3 x 10<sup>-4</sup> moles) and NaN<sub>3</sub> (1.0 g, 1.5 x 10<sup>-2</sup> moles) were then added. The reaction was heated to reflux for 48 hours and allowed to cool to room temperature. After confirming complete conversion to the azide by <sup>31</sup>P NMR, solvent was removed by rotovap. The resulting oily, off-white solid was dissolved in diethyl ether (200 mL) and washed two times with deionized H<sub>2</sub>O (100 mL) followed by a washing with a 4% aqueous NaHCO<sub>3</sub> (100 mL). The ether layer was dried with MgSO<sub>4</sub> and filtered to give a clear, colorless solution. The ether was then removed by rotovap giving a clear, colorless oil. The oil was further purified with multiple recrystallizations in hexanes at -55 °C. The product was dried under vacuum for 24 hrs. Yield: 1.1 g (53%). <sup>31</sup>P NMR (CDCl<sub>3</sub>) δ = 24.8 (t, 1P), 21.4 (d, 2P); <sup>1</sup>H NMR (CDCl<sub>3</sub>) δ = 2.7-2.6 (m, 18H); C<sub>8</sub>H<sub>24</sub>N<sub>13</sub>P<sub>3</sub> calculated mass 395.31; FAB(+)-MS: 396.1 [MH<sup>+</sup>].

**Synthesis of N<sub>3</sub>P<sub>3</sub>(N(CH<sub>2</sub>CH<sub>3</sub>)<sub>2</sub>)<sub>3</sub>Cl<sub>3</sub>.** This material was synthesized by a previously reported procedure.<sup>2</sup> However, THF was used as the solvent instead of benzene.

**Synthesis of N<sub>3</sub>P<sub>3</sub>(N(CH<sub>2</sub>CH<sub>3</sub>)<sub>2</sub>)<sub>3</sub>(N<sub>3</sub>)<sub>3</sub>.** N<sub>3</sub>P<sub>3</sub>(N(CH<sub>2</sub>CH<sub>3</sub>)<sub>2</sub>)<sub>3</sub>Cl<sub>3</sub> (1.5 g; 3.3 x 10<sup>-3</sup> mol) was dissolved in 2-butanone (30 mL). Sodium azide (0.84 g; 0.013 moles) and tetrabutylammonium bromide (0.20 g; 6.2 x 10<sup>-4</sup> mol) were added, and the reaction

mixture was refluxed for 48h. The solvent was removed by rotovap, and the resultant oily solid was extracted between diethyl ether (100 mL) and deionized water (100 mL). The ether layer was rinsed with a second portion of water (100 mL) and then dried with  $\text{MgSO}_4$ . The  $\text{MgSO}_4$  was filtered off and the ether removed by rotovap to yield an orange liquid. The liquid was further purified by column chromatography (90% hexane/10% diethyl ether) on silica gel. The fractions were combined, and the solvent removed by rotovap to yield a clear, colorless liquid which was dried under vacuum for 48h. Yield: 1.1 g (70%).  $^{31}\text{P}$  NMR ( $\text{CDCl}_3$ )  $\delta$  = 18.7-17.2 (m) ( appears to be a quartet 18.3 (1P) and doublet 17.4 (2P));  $^1\text{H}$  NMR ( $\text{CDCl}_3$ )  $\delta$  = 3.3-3.0 (m, 12H), 1.2-0.9 (overlapping triplets, 18H);  $\text{C}_{12}\text{H}_{30}\text{N}_{15}\text{P}_3$  calculated mass: 477.42; FAB(+)-MS: 478.4 [ $\text{MH}^+$ ].

**Synthesis of  $\text{N}_3\text{P}_3(\text{OCH}_2\text{CF}_3)_5\text{Cl}$ .** This compound was synthesized via literature procedure.<sup>3</sup> A mixture of the hexa-, penta- and tetra-trifluoroethoxy/chloro trimer derivatives was obtained.

**Synthesis of  $\text{N}_3\text{P}_3(\text{OCH}_2\text{CF}_3)_5\text{N}_3$ .** The mixture of the hexa-, penta- and tetra-trifluoroethoxy trimer derivatives ( $\text{N}_3\text{P}_3(\text{OCH}_2\text{CF}_3)_5\text{Cl}$  5.0 g,  $7.5 \times 10^{-3}$  mol) was dissolved in 2-butanone (50 mL). To this was added  $n\text{-Bu}_4\text{NBr}$  (0.14 g,  $4.3 \times 10^{-4}$  mol) and  $\text{NaN}_3$  (1.44 g,  $2.2 \times 10^{-2}$  mol). The reaction mixture was stirred at room temperature for 24 hrs. The solvent was removed by rotovap leaving a clear, colorless oil. The oil was dissolved in diethyl ether (50 mL) and washed twice with deionized  $\text{H}_2\text{O}$  (100 mL). The ether layer was dried with  $\text{MgSO}_4$  and filtered. The solvent was removed by rotovap and the product dried under vacuum.  $^{31}\text{P}$  NMR showed a mixture of products which appear to be the hexa-, penta- and tetra- trifluoroethoxy/azido trimers. The individual trimers could not be isolated from the mix.

**Reaction of  $\text{N}_3\text{P}_3(\text{OC}_6\text{H}_5)_5\text{N}_3$  with  $\text{P}(\text{C}_6\text{H}_5)_3$ .**  $\text{N}_3\text{P}_3(\text{OC}_6\text{H}_5)_5\text{N}_3$  was treated similarly with triphenylphosphine, triphenyl phosphite, triethyl phosphite, and hexamethylphosphorous triamide with the exception that triphenyl phosphite required toluene as the reaction solvent and a longer reaction time (48h). For brevity, only the reaction of  $\text{N}_3\text{P}_3(\text{OC}_6\text{H}_5)_5\text{N}_3$  with triphenylphosphine is detailed.  $\text{N}_3\text{P}_3(\text{OC}_6\text{H}_5)_5\text{N}_3$  (0.35 g,  $5.4 \times 10^{-4}$  mol) was dissolved in distilled THF (20 mL). Triphenylphosphine (0.23 g,  $8.8 \times 10^{-4}$  mol) was added, and the reaction was heated to reflux for 24h. The reaction was allowed to cool to room temperature, and the solvent was removed by rotovap to

yield a thick oil. The oil was dissolved in diethyl ether (40 mL) and extracted twice with deionized water (30 mL). The ether solution was then extracted with 2% aqueous  $\text{NaHCO}_3$  (30 mL), dried with  $\text{MgSO}_4$ , and filtered to yield a clear, colorless solution. The ether was partially evaporated until the solution became cloudy. The product was then crystallized by addition of hexanes (10 mL) and cooling to  $-11^\circ\text{C}$ . The solvent was poured off, and the white crystalline product was rinsed twice with hexanes (10 mL). The product was then dried under vacuum for 24h. Yield: 0.28 g (59%).  $^{31}\text{P}$  NMR ( $\text{CDCl}_3$ )  $\delta$  = 10.4 (d, 1P), 8.5 (d, 2P), 6.9-5.6 (m, 1P);  $^1\text{H}$  NMR ( $\text{CDCl}_3$ )  $\delta$  = 7.6-7.2 (m, 15H), 7.1-6.8 (m, 25H);  $\text{C}_{48}\text{H}_{40}\text{N}_4\text{O}_5\text{P}_4$  calculated mass: 876.72; FAB(+)-MS: 877.4  $[\text{MH}^+]$ .

**Reaction of  $\text{N}_3\text{P}_3(\text{OCH}_2\text{CF}_3)_5\text{N}_3$  with  $\text{P}(\text{C}_6\text{H}_5)_3$ .** The trifluoroethoxy/azido trimer mixture (5.4 g) was dissolved in 2-butanone. Triphenylphosphine (3.2 g,  $1.2 \times 10^{-2}$  mol) was added, and the reaction was refluxed for 24 hrs. The solvent was removed by rotovap. The resulting cloudy oil was dissolved in diethyl ether (40 mL) and washed twice with deionized  $\text{H}_2\text{O}$  (100 mL) followed by a washing with an aqueous 1%  $\text{NaHCO}_3$  solution (100 mL) to yield a clear, colorless oil. The product was further purified via column chromatography on silica gel using 50% dichloromethane/ 50% hexanes as the solvent. Fractions containing the desired product were combined, and the solvent was removed by rotovap. The resultant clear, colorless oil was then dried under vacuum for 24 hrs. Yield: 0.65 g.  $^{31}\text{P}$  NMR ( $\text{CDCl}_3$ )  $\delta$  = 17.4 (d, 2P), 13.6 (d, 1P), 10.4 (m, 1P);  $^1\text{H}$  NMR ( $\text{CDCl}_3$ )  $\delta$  = 7.7-7.2 (m, 15H), 4.3-3.9 (m, 6H), 3.8-3.6 (m, 4H);  $\text{C}_{28}\text{H}_{25}\text{F}_{15}\text{N}_4\text{O}_5\text{P}_4$  calculated mass: 906.40; FAB(+)-MS: 906.7  $[\text{MH}^+]$ .

**Reaction of  $\text{N}_3\text{P}_3(\text{OCH}_2\text{CF}_3)_5\text{N}_3$  with  $\text{P}(\text{OC}_6\text{H}_5)_3$ .** The trifluoroethoxy/azido trimer mixture (5.4 g) was dissolved in toluene. Triphenyl phosphite (3.8 g,  $1.2 \times 10^{-2}$  mol) was added and the reaction mixture was refluxed overnight. After confirming complete reaction by  $^{31}\text{P}$  NMR, the solvent was removed by rotovap. The resultant oil was dissolved in diethyl ether (40 mL) and washed twice with deionized  $\text{H}_2\text{O}$  (75 mL) followed by a washing with an aqueous 1%  $\text{NaHCO}_3$  solution (75 mL). The ether layer was dried with  $\text{MgSO}_4$ . The  $\text{MgSO}_4$  was filtered off, and the solvent was removed via rotovap yielding a clear, colorless oil. The product was further purified by column chromatography on silica gel using 67% dichloromethane/ 33% hexanes as the solvent.

Fractions containing the desired product were combined, and solvent was removed by rotovap. The resulting clear, colorless oil was dried under vacuum for 24 hrs. Yield: 0.32 g.  $^{31}\text{P}$  NMR ( $\text{CDCl}_3$ )  $\delta$  = 17.2 (d, 2P), 6.0 (q, 1P), -23.0 (1P);  $^1\text{H}$  NMR ( $\text{CDCl}_3$ )  $\delta$  = 7.6-7.2 (15H), 4.5-4.2 (m, 4H), 4.2-4.0 (m, 4H), 4.0-3.8 (m, 2H);  $\text{C}_{28}\text{H}_{25}\text{F}_{15}\text{N}_4\text{O}_8\text{P}_4$  calculated mass: 954.40; FAB(+)-MS: 954.7 [ $\text{MH}^+$ ].

**Reaction of  $\text{N}_3\text{P}_3(\text{OC}_6\text{H}_5)\text{N}_3$  with  $\text{C}_6\text{H}_5\text{CH}_2(\text{CH}_2)_7\text{CH}_3$ .**  $\text{N}_3\text{P}_3(\text{OC}_6\text{H}_5)\text{N}_3$  (0.3 g;  $5 \times 10^{-4}$  mol) was dissolved in 1-phenyl nonane (3.5 g; 0.017 mol), and the reaction was heated to reflux where vigorous gas evolution commenced. After about 5 minutes, the gas evolution slowed, and the reaction was allowed to cool to room temperature. The reaction was purified by column chromatography on silica (20%  $\text{Et}_2\text{O}$ / 80% hexanes). The solvent was removed by rotovap and the product dried under vacuum to yield a clear, colorless oil. Yield: 0.1 g (26%).  $^{31}\text{P}$  NMR ( $\text{CD}_2\text{Cl}_2$ )  $\delta$  = 11.7 (q, 1P), 8.9 (d, 2P);  $^1\text{H}$  NMR ( $\text{CD}_2\text{Cl}_2$ )  $\delta$  = 7.2-6.7 (29H), 4.51 (1H), 2.10 (t, 2H), 1.5-1.0 (m, 14H), 0.80 (t, 3H);  $\text{C}_{45}\text{H}_{49}\text{N}_4\text{O}_5\text{P}_3$  calculated mass: 818.79; FAB(+)-MS: 819.8 [ $\text{MH}^+$ ].

## References

- (1) Dell, D.; Fitzsimmons, W.; Shaw, R. A. *J. Chem. Soc.* **1965**, 4070.
- (2) Ray, S. K.; Shaw, R. A. *J. Chem. Soc.* **1961**, 872.
- (3) Schmutz, J. L.; Allcock, H.R. *Inorg. Chem.* **1975**, 14, 2433.
